# Supplementary material
Source: publisher figshare collection journal article supplement (https://acs.figshare.com/ndownloader/files/4159180)
Supplement: Supplementary file 1 [file 4159180]

#==============================================================================
data_global
#==============================================================================
 
# 0. AUDIT DETAILS
 
_audit_creation_date                 'Mar 26 10:47:19 2012'
_audit_creation_method               'PLATON <TABLE ACC> option'
_audit_update_record
;
;
 
#===============================================================================
 
# 1. SUBMISSION DETAILS
 
_publ_contact_author_name           
;   Prof. Tayur N. Guru Row
;
_publ_contact_author_address        
;   Solid State and Structural Chemistry Unit
     Indian Institute of Science
     C.V.Raman Avenue
     Bangalore
     560 012
     Karnataka
     India
;
 
_publ_contact_author_email           ssctng@sscu.iisc.ernet.in
_publ_contact_author_fax             '+31 30 2533940'
_publ_contact_author_phone           '+31 30 2532538'
 
_publ_requested_journal              'Crystal Growth and Design'
# Publication choise FI, CI or EI for Inorganic
#                    FM, CM or EM for Metal-organic
#                    FO, CO or EO for Organic
_publ_requested_category             ?
_publ_requested_coeditor_name        ?
 
_publ_contact_letter                # Include date of submission
;
Date of submission ?
 
Please consider this CIF submission for publication as a
Regular Structural Paper in Acta Crystallographica C.
;
 
#===============================================================================
 
# 2. PROCESSING SUMMARY (JOURNAL OFFICE ONLY)
 
_journal_date_recd_electronic        ?
 
_journal_date_to_coeditor            ?
_journal_date_from_coeditor          ?
_journal_date_accepted               ?
 
_journal_date_printers_first         ?
_journal_date_printers_final         ?
_journal_date_proofs_out             ?
_journal_date_proofs_in              ?
 
_journal_coeditor_name               ?
_journal_coeditor_code               ?
_journal_coeditor_notes
;
;
 
_journal_techeditor_code             ?
_journal_techeditor_notes
;
;
 
_journal_coden_ASTM                  ?
_journal_name_full                   ?
_journal_year                        ?
_journal_volume                      ?
_journal_issue                       ?
_journal_page_first                  ?
_journal_page_last                   ?
 
 
_journal_suppl_publ_number           ?
_journal_suppl_publ_pages            ?
 
 
#===============================================================================
 
# 3. TITLE AND AUTHOR LIST
 
_publ_section_title
;
Title (type here to add)
;
_publ_section_title_footnote
.
 
# The loop structure below should contain the names and adresses of all
# authors, in the required order of publication. Repeat as necessary.
 
 
loop_
_publ_author_name
_publ_author_address
_publ_author_footnote
_publ_author_email
'Row, Tayur N. Guru'
;
Solid State and Structural Chemistry Unit
Indian Institute of Science
C.V.Raman Avenue
Bangalore
560 012
Karnataka
India
;
;
# author related footnote
;
.
'Kaur, Ramanpreet'
;
Solid State and Structural Chemistry Unit
Indian Institute of Science
C.V.raman Avenue
Bangalore
560 012
Karnataka
India
;
.
.


 
#===============================================================================
 
# 4. TEXT
 
_publ_section_synopsis
;
 ?
;
_publ_section_abstract
;
 ?
;
 
# Insert blank lines between paragraphs
 
_publ_section_comment
;
;
_publ_section_exptl_prep
;
 ?
;
_publ_section_exptl_refinement
;
 ?
;
 
# Insert blank lines between references
 
_publ_section_references
;
 Allen, F.H. (2002).
   Acta Cryst. B58, 380-388.
 
 Altomare, A., Burla, M.C., Camalli, M., Cascarano, G.L., Giacovazzo, C.
   Guagliardi, A., Moliterni, A.G.G., Polidori, G. & Spagna, R.
   (1999) J. Appl. Cryst. 32, 115-119.
 
 Beurskens, P.T., Beurskens, G., de Gelder, R., Garc\'ia-Granda, S.,
 Gould, R.O., Israel, R. & Smits, J.M.M. (1999) The DIRDIF99 Program System,
   Technical Report of the Crystallography Laboratory,
   University of Nijmegen, The Netherlands.
 
 Boer, J.L. de & Duisenberg, A.J.M. (1984). Acta Cryst. A40, C-410.
 
 Boeyens, J.C.A. (1978). J.Cryst.Mol.Struct. 8, 317-320.
 
 Cremer, D. & Pople, J.A. (1975). J. Am. Chem. Soc. 97, 1354-1358.
 
 Duisenberg, A.J.M. (1992). J. Appl. Cryst. 25, 92-96.
 
 Duisenberg, A.J.M., Kroon-Batenburg, L.M.J. & Schreurs, A.M.M. (2003).
   J. Appl. Cryst. 36, 220-229.
 
 Enraf-Nonius (1989). CAD-4 Software. Version 5. Enraf-Nonius, Delft,
   The Netherlands.
 
 Flack, H.D. (1983). Acta Cryst. A39, 876-881.
 
 Hooft, R.W.W. (1998). Collect Software, Nonius B.V., Delft, The Netherlands.
 
 LePage, Y. (1987). J. Appl. Cryst. 20, 264-269.
 
 Mackay, A.L. (1984). Acta Cryst. A40, 165-166.
 
 Meulenaer, J. de & Tompa, H. (1965). Acta Cryst. 19, 1014-1018.
 
 North, A.C.T., Phillips, D.C. & Mathews, F.S. (1968).
  Acta Cryst. A24, 351-359.
 
 Otwinowski, Z. & Minor, W. (1997). Methods in Enzymology, Vol. 276,
   Macromolecular Crystallography, Part A, edited by C.W. Carter &
    R.M. Sweet, pp. 307-326. London: Academic Press.
 
 Sheldrick, G.M. (1986). SHELXS86. University of G\"ottingen, Germany.
 
 Sheldrick, G.M. (1993). SHELXL93. University of G\"ottingen, Germany.
 
 Sheldrick, G.M. (1997). SHELXS97. University of G\"ottingen, Germany.
 
 Sheldrick, G.M. (1997). SHELXL97. University of G\"ottingen, Germany.
 
 Sluis, P. van der & Spek, A.L. (1990). Acta Cryst. A46, 194-201.
 
 Spek, A.L. (1987). Acta Cryst. C43, 1233-1235.
 
 Spek, A.L. (1988). J. Appl. Cryst. 21, 578-579.
 
 Spek, A.L. (1994). Am. Crystallogr. Assoc.-Abstracts, 22, 66.
 
 Spek, A.L. (1997). HELENA, Program for Datareduction, Utrecht
   University, The Netherlands.
 
 Spek, A.L. (2003). J. Appl. Cryst. 36, 7-13.
 
 Wilson, A.J.C. (1992). Ed. International Tables for Crystallography,
   Volume C, Kluwer Academic Publishers, Dordrecht, The Netherlands.
;
_publ_section_acknowledgements
;
;
_publ_section_figure_captions
; View of the title compound with the atom numbering scheme.
Displacement ellipsoids for non-H atoms are drawn at the 50% probability level.
;
 
#===============================================================================
 
data_final
 
#===============================================================================
 
# 5. CHEMICAL DATA
 
_chemical_name_systematic
;
;
_chemical_name_common                'gallic acid monohydrate acetamide'
_chemical_melting_point              ?
_chemical_formula_moiety
'C7 H6 O5, C2 H5 N O'
# Ex: 'C12 H16 N2 O6, H2 O' and '(Cd 2+)3, (C6 N6 Cr 3-)2, 2(H2 O)'
_chemical_formula_structural         ?
_chemical_formula_sum
'C9 H11 N O6'
_chemical_formula_iupac              ?
_chemical_formula_weight                229.19
_chemical_compound_source           'see text'
 
loop_
_atom_type_symbol
_atom_type_description
_atom_type_scat_dispersion_real
_atom_type_scat_dispersion_imag
_atom_type_scat_source
 O   O    0.0106    0.0060
 'International Tables Vol C Tables 4.2.6.8 and 6.1.1.4'
 N   N    0.0061    0.0033
 'International Tables Vol C Tables 4.2.6.8 and 6.1.1.4'
 H   H    0.0000    0.0000
 'International Tables Vol C Tables 4.2.6.8 and 6.1.1.4'
 C   C    0.0033    0.0016
 'International Tables Vol C Tables 4.2.6.8 and 6.1.1.4'
 
#===============================================================================
 
# 6. CRYSTAL DATA
 
_symmetry_cell_setting                 Monoclinic
_symmetry_space_group_name_Hall      '-P 2yn'
_symmetry_space_group_name_H-M       'P 21/n'
_symmetry_Int_Tables_number                 14
 
loop_
_symmetry_equiv_pos_site_id
_symmetry_equiv_pos_as_xyz
   1 x,y,z
   2 1/2-x,1/2+y,1/2-z
   3 -x,-y,-z
   4 1/2+x,1/2-y,1/2+z
 
_cell_length_a                           4.2630(2)
_cell_length_b                         22.5002(10)
_cell_length_c                          10.0489(3)
_cell_angle_alpha                               90
_cell_angle_beta                         92.868(3)
_cell_angle_gamma                               90
_cell_volume                             962.67(7)
_cell_formula_units_Z                    4
_cell_measurement_temperature        110(2)
_cell_measurement_reflns_used        5890
_cell_measurement_theta_min          2.7
_cell_measurement_theta_max          25.0
_cell_special_details
;
;
 
_exptl_crystal_description          'needle'
_exptl_crystal_colour               'colourless'
 
_exptl_crystal_size_max              0.22
_exptl_crystal_size_mid              0.20
_exptl_crystal_size_min              0.18
_exptl_crystal_size_rad              ?
_exptl_crystal_density_meas          ?
_exptl_crystal_density_diffrn            1.581
_exptl_crystal_density_method       'Not Measured'
_exptl_crystal_F_000                       480
_exptl_absorpt_coefficient_mu            0.135
_exptl_crystal_density_meas_temp     ?
 
# Permitted for _exptl_absorpt_correction_type :
# analytical     'analytical from crystal shape'
#                Example: de Meulenaer&Tompa: ABST
# cylinder       'cylindrical'
# gaussian       'Gaussian from crystal shape'
#                Example: PLATON/ABSG
# integration    'integration from crystal shape'
# multi-scan     'symmetry-related measurements'
#                Example: SADABS, MULABS
# none           'no absorption corr. applied'
# numerical      'numerical from crystal shape'
# psi-scan       'psi-scan corrections'
#                Example: PLATON/ABSP
# refdelf        'refined from delta-F'
#                Example: SHELXA,
# sphere         'spherical'
#                Example: PLATON/ABSS
_exptl_absorpt_correction_type      'multi-scan'
_exptl_absorpt_process_details     'CrysAlis RED (Oxford Diffraction,2009)'

_exptl_absorpt_correction_T_min   0.9709
_exptl_absorpt_correction_T_max   0.9761
 
#===============================================================================
 
# 7. EXPERIMENTAL DATA
 
_exptl_special_details
;
;
_diffrn_ambient_temperature          110(2)
_diffrn_radiation_wavelength           0.71073
_diffrn_radiation_probe              'x-ray'
_diffrn_radiation_type               'MoK\a'
_diffrn_radiation_source             'Enhance (Mo) X-ray Source'
_diffrn_radiation_monochromator      'graphite'
_diffrn_measurement_device_type      'Oxford Xcalibur,Eos(Nova) CCD detector'
_diffrn_measurement_method           '\w scans'
_diffrn_detector_area_resol_mean     ?
 
# number of measured reflections (redundant set)
_diffrn_reflns_number             5890
_diffrn_reflns_av_R_equivalents   0.0364
_diffrn_reflns_av_sigmaI/netI     0.0353
_diffrn_reflns_limit_h_min        -5
_diffrn_reflns_limit_h_max        5
_diffrn_reflns_limit_k_min        -26
_diffrn_reflns_limit_k_max        26
_diffrn_reflns_limit_l_min        -11
_diffrn_reflns_limit_l_max        11
_diffrn_reflns_theta_min          2.72
_diffrn_reflns_theta_max          24.99
_diffrn_measured_fraction_theta_max    0.999
_diffrn_reflns_theta_full              24.99
_diffrn_measured_fraction_theta_full   0.999
_diffrn_reflns_reduction_process
;
;
 
# number of unique reflections
_reflns_number_total                 1682
# number of observed reflections (> n sig(I))
_reflns_number_gt                    1418
_reflns_threshold_expression      >2sigma(I)
 
_computing_data_collection
;
CrysAlisPro, Agilent Technologies,
Version 1.171.35.19 (release 27-10-2011 CrysAlis171 .NET)
(compiled Oct 27 2011,15:02:11)
;
_computing_cell_refinement
;
CrysAlisPro, Agilent Technologies,
Version 1.171.35.19 (release 27-10-2011 CrysAlis171 .NET)
(compiled Oct 27 2011,15:02:11)
;
_computing_data_reduction
;
CrysAlisPro, Agilent Technologies,
Version 1.171.35.19 (release 27-10-2011 CrysAlis171 .NET)
(compiled Oct 27 2011,15:02:11)
;  
_computing_structure_solution    'SHELXS97  (Sheldrick, 2008)' 
_computing_structure_refinement  'SHELXL97 (Sheldrick, 2008)'
_computing_molecular_graphics     
 'Ortep-3 (Farrugia, 1997) and CAMERON (Watkin et al., 1993)' 
_computing_publication_material    'WinGX (Farrugia, 1999)'
 
 
#===============================================================================
 
# 8. REFINEMENT DATA
 
_refine_special_details
;
 Refinement of F^2^ against ALL reflections.  The weighted R-factor wR and
 goodness of fit S are based on F^2^, conventional R-factors R are based
 on F, with F set to zero for negative F^2^. The threshold expression of
 F^2^ > 2sigma(F^2^) is used only for calculating R-factors(gt) etc. and is
 not relevant to the choice of reflections for refinement.  R-factors based
 on F^2^ are statistically about twice as large as those based on F, and R-
 factors based on ALL data will be even larger.
;
 
_refine_ls_structure_factor_coef  Fsqd
_refine_ls_matrix_type            full
_refine_ls_weighting_scheme       calc
_refine_ls_weighting_details
 'calc w=1/[\s^2^(Fo^2^)+(0.0491P)^2^+0.1682P] where P=(Fo^2^+2Fc^2^)/3'
_atom_sites_solution_primary      direct
_atom_sites_solution_secondary    difmap
_atom_sites_solution_hydrogens    geom
_refine_ls_hydrogen_treatment     mixed
_refine_ls_extinction_method      none
_refine_ls_extinction_coef        ?
_refine_ls_number_reflns          1682
_refine_ls_number_parameters      178
_refine_ls_number_restraints      0
_refine_ls_R_factor_all           0.0453
_refine_ls_R_factor_gt            0.0364
_refine_ls_wR_factor_ref          0.0991
_refine_ls_wR_factor_gt           0.0915
_refine_ls_goodness_of_fit_ref    1.090
_refine_ls_restrained_S_all       1.090
_refine_ls_shift/su_max           0.000
_refine_ls_shift/su_mean          0.000
_refine_diff_density_max    0.177
_refine_diff_density_min   -0.268
_refine_diff_density_rms    0.052
#===============================================================================
 
# 9. ATOMIC COORDINATES AND DISPLACEMENT PARAMETERS
 
loop_
 _atom_site_label
 _atom_site_type_symbol
 _atom_site_fract_x
 _atom_site_fract_y
 _atom_site_fract_z
 _atom_site_U_iso_or_equiv
 _atom_site_adp_type
 _atom_site_occupancy
 _atom_site_symmetry_multiplicity
 _atom_site_calc_flag
 _atom_site_refinement_flags
 _atom_site_disorder_assembly
 _atom_site_disorder_group
O3 O 0.3738(3) 0.17974(6) 0.63174(11) 0.0155(3) Uani 1 1 d . . .
O4 O 0.6272(3) 0.24655(5) 0.83644(12) 0.0146(3) Uani 1 1 d . . .
O2 O -0.3038(3) 0.02843(6) 0.85198(11) 0.0183(3) Uani 1 1 d . . .
O5 O 0.4510(3) 0.22821(6) 1.09397(11) 0.0163(3) Uani 1 1 d . . .
O1 O -0.2778(3) 0.05227(6) 1.06836(11) 0.0184(3) Uani 1 1 d . . .
C2 C 0.0077(3) 0.11084(8) 0.91827(15) 0.0138(4) Uani 1 1 d . . .
O6 O 0.4687(3) 0.07912(6) 0.51520(12) 0.0267(4) Uani 1 1 d . . .
C5 C 0.4170(4) 0.20267(8) 0.85996(15) 0.0130(4) Uani 1 1 d . . .
C7 C 0.0826(4) 0.12104(8) 0.78657(16) 0.0136(4) Uani 1 1 d . . .
C6 C 0.2868(4) 0.16652(7) 0.75827(16) 0.0127(4) Uani 1 1 d . . .
C3 C 0.1310(4) 0.14775(8) 1.01987(16) 0.0141(4) Uani 1 1 d . . .
C4 C 0.3330(4) 0.19334(8) 0.99081(15) 0.0132(4) Uani 1 1 d . . .
C1 C -0.2026(4) 0.06207(8) 0.95387(16) 0.0139(4) Uani 1 1 d . . .
N1 N 0.7434(4) 0.02982(8) 0.36633(15) 0.0212(4) Uani 1 1 d . . .
C8 C 0.7291(5) 0.13698(9) 0.35511(19) 0.0271(5) Uani 1 1 d . . .
H8A H 0.6260 0.1699 0.3993 0.041 Uiso 1 1 calc R . .
H8B H 0.6630 0.1366 0.2603 0.041 Uiso 1 1 calc R . .
H8C H 0.9575 0.1420 0.3648 0.041 Uiso 1 1 calc R . .
C9 C 0.6392(4) 0.07974(8) 0.41731(16) 0.0171(4) Uani 1 1 d . . .
H3 H 0.075(4) 0.1424(8) 1.1116(19) 0.014(4) Uiso 1 1 d . . .
H7 H -0.005(4) 0.0980(9) 0.7152(19) 0.019(5) Uiso 1 1 d . . .
H1A H 0.677(4) -0.0053(10) 0.401(2) 0.023(5) Uiso 1 1 d . . .
H1B H 0.852(5) 0.0322(10) 0.296(2) 0.034(6) Uiso 1 1 d . . .
H2O H -0.442(7) -0.0001(13) 0.884(3) 0.062(8) Uiso 1 1 d . . .
H4O H 0.687(5) 0.2449(11) 0.757(3) 0.044(7) Uiso 1 1 d . . .
H5O H 0.577(6) 0.2547(11) 1.069(2) 0.040(7) Uiso 1 1 d . . .
H3O H 0.404(6) 0.1447(12) 0.585(3) 0.052(7) Uiso 1 1 d . . .
 
loop_
 _atom_site_aniso_label
 _atom_site_aniso_U_11
 _atom_site_aniso_U_22
 _atom_site_aniso_U_33
 _atom_site_aniso_U_23
 _atom_site_aniso_U_13
 _atom_site_aniso_U_12
O3 0.0222(6) 0.0139(7) 0.0108(6) 0.0002(5) 0.0040(4) 0.0003(5)
O4 0.0165(6) 0.0138(7) 0.0137(6) 0.0007(5) 0.0040(4) -0.0020(5)
O2 0.0207(7) 0.0176(7) 0.0165(6) -0.0011(5) 0.0005(5) -0.0056(5)
O5 0.0194(7) 0.0168(7) 0.0129(6) -0.0023(5) 0.0017(5) -0.0050(5)
O1 0.0197(7) 0.0196(8) 0.0159(6) 0.0029(5) 0.0019(5) -0.0041(5)
C2 0.0093(8) 0.0150(10) 0.0170(8) 0.0017(7) 0.0013(6) 0.0033(7)
O6 0.0441(8) 0.0163(8) 0.0212(7) -0.0010(5) 0.0168(6) -0.0031(6)
C5 0.0114(8) 0.0113(9) 0.0164(8) 0.0010(7) 0.0014(6) 0.0031(7)
C7 0.0135(8) 0.0131(9) 0.0143(8) -0.0018(7) -0.0001(6) 0.0031(7)
C6 0.0129(8) 0.0125(9) 0.0129(8) 0.0026(7) 0.0027(6) 0.0055(7)
C3 0.0122(8) 0.0162(10) 0.0142(9) 0.0016(7) 0.0020(6) 0.0030(7)
C4 0.0117(8) 0.0131(10) 0.0146(8) -0.0014(7) -0.0004(6) 0.0035(7)
C1 0.0121(8) 0.0134(10) 0.0162(8) 0.0004(7) 0.0000(6) 0.0035(7)
N1 0.0312(9) 0.0158(10) 0.0173(8) -0.0011(7) 0.0089(6) -0.0046(7)
C8 0.0405(11) 0.0174(11) 0.0247(10) -0.0008(8) 0.0145(8) -0.0029(9)
C9 0.0199(9) 0.0181(10) 0.0132(8) -0.0013(7) -0.0009(6) -0.0030(8)
#===============================================================================
 
# 10. MOLECULAR GEOMETRY
 
_geom_special_details
;
 All esds (except the esd in the dihedral angle between two l.s. planes)
 are estimated using the full covariance matrix.  The cell esds are taken
 into account individually in the estimation of esds in distances, angles
 and torsion angles; correlations between esds in cell parameters are only
 used when they are defined by crystal symmetry.  An approximate (isotropic)
 treatment of cell esds is used for estimating esds involving l.s. planes.
;
 
loop_
 _geom_bond_atom_site_label_1
 _geom_bond_atom_site_label_2
 _geom_bond_distance
 _geom_bond_site_symmetry_2
 _geom_bond_publ_flag
O3 C6 1.375(2) . ?
O3 H3O 0.93(3) . ?
O4 C5 1.362(2) . ?
O4 H4O 0.85(3) . ?
O2 C1 1.328(2) . ?
O2 H2O 0.94(3) . ?
O5 C4 1.375(2) . ?
O5 H5O 0.85(3) . ?
O1 C1 1.230(2) . ?
C2 C7 1.396(2) . ?
C2 C3 1.398(2) . ?
C2 C1 1.472(2) . ?
O6 C9 1.252(2) . ?
C5 C4 1.396(2) . ?
C5 C6 1.399(2) . ?
C7 C6 1.382(2) . ?
C7 H7 0.95(2) . ?
C3 C4 1.380(3) . ?
C3 H3 0.971(19) . ?
N1 C9 1.321(2) . ?
N1 H1A 0.91(2) . ?
N1 H1B 0.86(2) . ?
C8 C9 1.490(3) . ?
C8 H8A 0.9800 . ?
C8 H8B 0.9800 . ?
C8 H8C 0.9800 . ?
 
loop_
 _geom_angle_atom_site_label_1
 _geom_angle_atom_site_label_2
 _geom_angle_atom_site_label_3
 _geom_angle
 _geom_angle_site_symmetry_1
 _geom_angle_site_symmetry_3
 _geom_angle_publ_flag
C6 O3 H3O 109.7(16) . . ?
C5 O4 H4O 111.2(16) . . ?
C1 O2 H2O 108.1(17) . . ?
C4 O5 H5O 112.7(16) . . ?
C7 C2 C3 119.94(16) . . ?
C7 C2 C1 121.60(15) . . ?
C3 C2 C1 118.46(15) . . ?
O4 C5 C4 118.32(14) . . ?
O4 C5 C6 122.35(14) . . ?
C4 C5 C6 119.32(16) . . ?
C6 C7 C2 119.55(15) . . ?
C6 C7 H7 118.6(11) . . ?
C2 C7 H7 121.9(11) . . ?
O3 C6 C7 123.52(15) . . ?
O3 C6 C5 115.74(15) . . ?
C7 C6 C5 120.73(15) . . ?
C4 C3 C2 120.19(15) . . ?
C4 C3 H3 118.6(11) . . ?
C2 C3 H3 121.2(11) . . ?
O5 C4 C3 118.24(14) . . ?
O5 C4 C5 121.53(15) . . ?
C3 C4 C5 120.22(15) . . ?
O1 C1 O2 121.95(16) . . ?
O1 C1 C2 123.47(15) . . ?
O2 C1 C2 114.57(14) . . ?
C9 N1 H1A 118.2(13) . . ?
C9 N1 H1B 117.9(15) . . ?
H1A N1 H1B 123(2) . . ?
C9 C8 H8A 109.5 . . ?
C9 C8 H8B 109.5 . . ?
H8A C8 H8B 109.5 . . ?
C9 C8 H8C 109.5 . . ?
H8A C8 H8C 109.5 . . ?
H8B C8 H8C 109.5 . . ?
O6 C9 N1 121.00(17) . . ?
O6 C9 C8 120.72(16) . . ?
N1 C9 C8 118.28(16) . . ?
 
loop_
 _geom_torsion_atom_site_label_1
 _geom_torsion_atom_site_label_2
 _geom_torsion_atom_site_label_3
 _geom_torsion_atom_site_label_4
 _geom_torsion
 _geom_torsion_site_symmetry_1
 _geom_torsion_site_symmetry_2
 _geom_torsion_site_symmetry_3
 _geom_torsion_site_symmetry_4
 _geom_torsion_publ_flag
C3 C2 C7 C6 2.1(2) . . . . ?
C1 C2 C7 C6 -178.52(15) . . . . ?
C2 C7 C6 O3 179.98(14) . . . . ?
C2 C7 C6 C5 -0.5(2) . . . . ?
O4 C5 C6 O3 -2.8(2) . . . . ?
C4 C5 C6 O3 178.06(14) . . . . ?
O4 C5 C6 C7 177.69(14) . . . . ?
C4 C5 C6 C7 -1.5(2) . . . . ?
C7 C2 C3 C4 -1.6(2) . . . . ?
C1 C2 C3 C4 178.93(14) . . . . ?
C2 C3 C4 O5 -179.41(14) . . . . ?
C2 C3 C4 C5 -0.4(2) . . . . ?
O4 C5 C4 O5 1.7(2) . . . . ?
C6 C5 C4 O5 -179.07(14) . . . . ?
O4 C5 C4 C3 -177.28(14) . . . . ?
C6 C5 C4 C3 1.9(2) . . . . ?
C7 C2 C1 O1 -178.84(15) . . . . ?
C3 C2 C1 O1 0.6(2) . . . . ?
C7 C2 C1 O2 1.9(2) . . . . ?
C3 C2 C1 O2 -178.65(14) . . . . ?

 
 
#===END
